# Supplementary material
Source: ML conference proceedings conference paper supplement (https://openreview.net/forum?id=vlpAgjkw39)
Supplement: supplementary_material [file appendix.pdf › appendix.pdf]

|     |                                                                  |           |
|-----|------------------------------------------------------------------|-----------|
| 594 | APPENDIX                                                         |           |
| 595 |                                                                  |           |
| 596 |                                                                  |           |
| 597 | <b>A Experimental Setups</b>                                     | <b>13</b> |
| 598 |                                                                  |           |
| 599 | <b>B Baseline Methods</b>                                        | <b>13</b> |
| 600 |                                                                  |           |
| 601 | B.1 Machine Learning (ML) Models . . . . .                       | 13        |
| 602 | B.2 Deep Learning (Non-Foundation) Models . . . . .              | 14        |
| 603 | B.3 Deep Learning (Foundation) Models based on ICL . . . . .     | 14        |
| 604 |                                                                  |           |
| 605 |                                                                  |           |
| 606 | <b>C Baseline Implementations</b>                                | <b>14</b> |
| 607 |                                                                  |           |
| 608 | <b>D Theoretical Justification</b>                               | <b>15</b> |
| 609 |                                                                  |           |
| 610 | D.1 Relation to Label Shift Correction . . . . .                 | 15        |
| 611 | D.2 Bayesian Interpretation . . . . .                            | 15        |
| 612 |                                                                  |           |
| 613 | <b>E Classical Methods for Label Shift Correction</b>            | <b>16</b> |
| 614 |                                                                  |           |
| 615 | E.1 Prior-ratio Adjustment . . . . .                             | 16        |
| 616 | E.2 EM-based Estimation . . . . .                                | 16        |
| 617 | E.3 Black-box Estimation . . . . .                               | 16        |
| 618 |                                                                  |           |
| 619 |                                                                  |           |
| 620 | <b>F Hyperparameter Tuning for Stronger Baselines</b>            | <b>17</b> |
| 621 |                                                                  |           |
| 622 | <b>G Dataset Statistics</b>                                      | <b>18</b> |
| 623 |                                                                  |           |
| 624 | <b>H K-means Clustering for Dataset Selection</b>                | <b>21</b> |
| 625 |                                                                  |           |
| 626 | <b>I Application to LoCalPFN</b>                                 | <b>22</b> |
| 627 |                                                                  |           |
| 628 |                                                                  |           |
| 629 | <b>J Comparison with Methods for Label Shift Correction</b>      | <b>23</b> |
| 630 |                                                                  |           |
| 631 | <b>K Predicted Distribution of Single vs. Multiple Instances</b> | <b>24</b> |
| 632 |                                                                  |           |
| 633 | <b>L Other Metrics</b>                                           | <b>25</b> |
| 634 |                                                                  |           |
| 635 |                                                                  |           |
| 636 |                                                                  |           |
| 637 |                                                                  |           |
| 638 |                                                                  |           |
| 639 |                                                                  |           |
| 640 |                                                                  |           |
| 641 |                                                                  |           |
| 642 |                                                                  |           |
| 643 |                                                                  |           |
| 644 |                                                                  |           |
| 645 |                                                                  |           |
| 646 |                                                                  |           |
| 647 |                                                                  |           |

## A EXPERIMENTAL SETUPS

**Experimental setups.** We use the official implementation of TabPFN<sup>3</sup> and adopt all default settings without modification. This includes architectural choices such as the number of layers and hidden dimensions, where we use 12 transformer layers, each with a hidden size of 192 and 6 attention heads. The feedforward layer dimension is implicitly set to 768 via a hidden factor of 4. For inference, we load the pretrained weights from TabPFN-v2<sup>4</sup> available on Hugging Face.

**Dataset.** We evaluate on 250+ tabular datasets from OpenML (Bischl et al., 2017). The dataset list is retrieved from the benchmark configuration provided in this repository<sup>5</sup>, which is built on top of the official TabPFN evaluation setup. Dataset statistics are summarized in Appendix G.

## B BASELINE METHODS

We categorize 15 baseline tabular models into three groups:

- **ML models (7):** Logistic Regression (LR), Support Vector Machines (SVM), Random Forest (Liaw & Wiener, 2002),  $k$ -nearest neighbors ( $k$ NN), Multi-layer Perceptrons (MLP), LightGBM (Ke et al., 2017), CatBoost (Prokhorenkova et al., 2018)
- **DL (non-foundation) models (5):** FT-Transformer (Gorishniy et al., 2021), TabM (Gorishniy et al., 2024a), TabulaRNN (Thielmann & Samiee, 2024), MambaTab (Ahamed & Cheng, 2024), RealMLP (Holzmüller et al., 2024)
- **DL (foundation) models based on ICL (3):** TabPFN-v2 (Hollmann et al., 2025), LoCalPFN (Thomas et al., 2024), TabICL (Qu et al., 2025)

Details of each method are provided below.

### B.1 MACHINE LEARNING (ML) MODELS

- **Logistic Regression (LR)** (Cox, 1958): A simple linear model commonly used for binary and multiclass classification tasks in tabular data.
- **Support Vector Machine (SVM)** (Cortes & Vapnik, 1995): A kernel-based classifier that aims to find the optimal decision boundary with maximum margin between classes.
- **Multilayer Perceptron (MLP)** (Haykin, 1994): A feedforward neural network consisting of multiple fully connected layers with non-linear activations, trained via backpropagation.
- **$k$ -Nearest Neighbors ( $k$ NN)** (Altman, 1992): A non-parametric method that classifies a sample based on the majority class among its  $k$  nearest neighbors in the feature space.
- **Random Forest** (Liaw & Wiener, 2002): An ensemble learning method based on bagging over decision trees, which improves robustness and generalization.
- **LightGBM (Ke et al., 2017):** A fast and efficient GBDT model using histogram-based algorithms and leaf-wise tree growth.
- **CatBoost (Prokhorenkova et al., 2018):** A GBDT model that handles categorical features efficiently and mitigates prediction shift via ordered boosting.

<sup>3</sup><https://github.com/PriorLabs/TabPFN>

<sup>4</sup><https://huggingface.co/Prior-Labs/TabPFN-v2-clf>

<sup>5</sup>[https://github.com/carteakey/tabpfn-eval/blob/main/src/data/openml\\_list.csv](https://github.com/carteakey/tabpfn-eval/blob/main/src/data/openml_list.csv)

## B.2 DEEP LEARNING (NON-FOUNDATION) MODELS

- **FT-Transformer (Gorishniy et al., 2021)**: A transformer-based architecture tailored for tabular data, providing a simple yet powerful baseline that outperforms many prior DL models on classification and regression tasks.
- **TabM (Gorishniy et al., 2024a)**: An MLP-based model that leverages an efficient ensemble mechanism to approximate deep ensembles, enabling multiple predictions per instance while maintaining computational efficiency.
- **TabulaRNN (Thielmann & Samiee, 2024)**: An RNN-inspired architecture for tabular data that emphasizes efficiency, addressing limitations of NLP-style models in terms of scalability and training cost.
- **MambaTab (Ahamed & Cheng, 2024)**: A scalable and efficient model built on structured state-space models (SSMs), capturing long-range dependencies with fewer parameters while maintaining strong predictive performance.
- **RealMLP (Holzmüller et al., 2024)**: An enhanced MLP variant with meta-tuned hyperparameters, achieving competitive accuracy–efficiency trade-offs compared to gradient boosting methods in tabular benchmarks.

## B.3 DEEP LEARNING (FOUNDATION) MODELS BASED ON ICL

- **LoCalPFN (Thomas et al., 2024)**: A lightweight PFN variant that reduces computational cost by leveraging local task priors and architectural simplifications.
- **TabICL (Qu et al., 2025)**: A two-stage model that first applies column attention to capture feature dependencies and then row attention to encode sample interactions.
- **TabPFN-v2 (Hollmann et al., 2025)**: A state-of-the-art foundation model for tabular classification that leverages a pretrained transformer for zero-shot prediction on small datasets.

## C BASELINE IMPLEMENTATIONS

The baseline results are obtained from the following publicly available repositories:

- [1] **TabPFN Evaluation** framework<sup>6</sup> was used to evaluate all ML models, as well as the foundation models *TabPFN* and *LoCalPFN*. Since *LoCalPFN* does not have an official implementation, we reimplemented it based on the *TabPFN* codebase.
- [2] **AutoGluon v1.4.0**<sup>7</sup> was used to benchmark *TabICL* and several non-foundation models such as *FT-Transformer*, *TabM*, and *RealMLP*.
- [3] **Mambular**<sup>8</sup> provided implementations for additional non-foundation models including *MambaTab*, *TabulaRNN*, *FT-Transformer*, and *TabM*.

For models implemented in both [2] and [3] (e.g., *FT-Transformer* and *TabM*), we use the [2] versions as they yield stronger performance for a stronger baseline.

<sup>6</sup><https://github.com/carteakey/tabpfn-eval>

<sup>7</sup><https://auto.gluon.ai/>

<sup>8</sup><https://github.com/OpenTabular/DeepTabular>

## D THEORETICAL JUSTIFICATION

We provide theoretical grounding for our posterior adjustment to clarify that DistPFN is not merely a heuristic trick, but a principled approximation derived from existing theory. We present two complementary perspectives: 1) connection to classical label shift correction as a plug-in reweighting (Section D.1) and 2) Bayesian view that replaces the mismatched prior with a self-consistent estimate from model predictions (Section D.2).

### D.1 RELATION TO LABEL SHIFT CORRECTION

The label shift setting assumes that the conditional distribution  $p(x|y)$  remains invariant while the marginal priors differ:

$$p_{\text{train}}(y) \neq p_{\text{test}}(y), \quad p(x|y) \text{ is fixed.}$$

Under this assumption, the Bayes-optimal posterior is given by

$$p_{\text{test}}(y|x) \propto \frac{p_{\text{train}}(y|x)}{p_{\text{train}}(y)} p_{\text{test}}(y).$$

Classical approaches such as EM-based reweighting (Saerens et al., 2002; Lipton et al., 2018) estimate  $p_{\text{test}}(y)$  explicitly by matching marginal predictions to unlabeled test data. DistPFN instead uses the predictive marginal  $\hat{p}(y)$  obtained directly from the model, and constructs the adjustment factor

$$\alpha(y) = \frac{\hat{p}(y)}{p_{\text{train}}(y)}.$$

This yields the corrected posterior

$$\hat{p}(y|x) \propto \frac{p_{\text{train}}(y|x)}{p_{\text{train}}(y)} \hat{p}(y),$$

which can be seen as a plug-in realization of the classical correction rule, avoiding iterative estimation while remaining theoretically consistent with label shift correction.

### D.2 BAYESIAN INTERPRETATION

From a Bayesian perspective, TabPFN models the posterior under the training distribution:

$$p_{\text{train}}(y|x) \propto p(x|y) p_{\text{train}}(y).$$

At test time, however, the desired posterior is

$$p_{\text{test}}(y|x) \propto p(x|y) p_{\text{test}}(y).$$

The difference comes solely from the prior. DistPFN addresses this gap by substituting  $p_{\text{train}}(y)$  with  $\hat{p}(y)$ , the average predictive distribution obtained on the test set:

$$\hat{p}_{\text{DistPFN}}(y|x) \propto \frac{p_{\text{train}}(y|x)}{p_{\text{train}}(y)} \hat{p}(y).$$

This interpretation shows that DistPFN is not an ad-hoc adjustment but a Bayesian posterior correction where the unknown test prior is approximated in a self-consistent manner from model outputs. The method therefore inherits a principled justification while retaining the efficiency of a simple, training-free plug-in procedure.

## E CLASSICAL METHODS FOR LABEL SHIFT CORRECTION

In this section, we summarize three representative approaches for handling label shift. All of these methods directly adjust classifier outputs, but they differ in how the test prior  $\pi_{\text{test}}$  is obtained.

### E.1 PRIOR-RATIO ADJUSTMENT

Prior-ratio Adjustment (Elkan, 2001) introduces a simple correction under changing class priors in the binary setting. The method assumes that the new prior  $\pi_{\text{test}}$  is available from external knowledge or domain statistics. Given a posterior  $p_{\text{train}}(1|x)$  trained under  $\pi_{\text{train}}$ , the corrected posterior is

$$p_{\text{test}}(1|x) = \frac{p_{\text{train}}(1|x) \cdot \frac{\pi_{\text{test}}(1)}{\pi_{\text{train}}(1)}}{p_{\text{train}}(1|x) \cdot \frac{\pi_{\text{test}}(1)}{\pi_{\text{train}}(1)} + (1 - p_{\text{train}}(1|x)) \cdot \frac{1 - \pi_{\text{test}}(1)}{1 - \pi_{\text{train}}(1)}}.$$

This approach directly modifies posterior probabilities by scaling them with prior ratios. The same principle naturally extends to the multiclass case by applying the ratio  $\pi_{\text{test}}(y)/\pi_{\text{train}}(y)$  to each class posterior.

### E.2 EM-BASED ESTIMATION

EM-based Estimation (Saerens et al., 2002) proposes an iterative procedure to estimate unknown test priors when they are not directly given. At iteration  $t$ , the posterior is updated by

$$p^{(t+1)}(y|x) \propto p_{\text{train}}(y|x) \cdot \frac{\pi_{\text{test}}^{(t)}(y)}{\pi_{\text{train}}(y)}.$$

The updated posteriors provide a new estimate of  $\pi_{\text{test}}$  by averaging across the test set. Repeating this E-step and M-step allows the estimated test prior to gradually converge. The final corrected posterior then follows the standard prior-ratio adjustment, but with  $\pi_{\text{test}}$  estimated rather than assumed.

### E.3 BLACK-BOX ESTIMATION

Black-box Estimation (Lipton et al., 2018) employs a validation dataset with true labels to construct a confusion matrix  $C(s|y) = P(\hat{y} = s | y)$  that characterizes prediction errors of the classifier. On an unlabeled test set, it collects predicted labels to obtain the empirical distribution  $p_{\text{test}}(s)$ . These quantities are related through the equation

$$p_{\text{test}}(s) \approx \sum_y C(s|y) \pi_{\text{test}}(y).$$

By solving this linear system, the method estimates the test prior  $\pi_{\text{test}}$ . Once the test prior is recovered, the posterior correction is applied using the prior ratio:

$$p_{\text{test}}(y|x) \propto p_{\text{train}}(y|x) \cdot \frac{\pi_{\text{test}}(y)}{\pi_{\text{train}}(y)}.$$

This approach is considered black-box as it does not require access to classifier internals, only its predicted outputs and a validation set to estimate the confusion matrix.

## F HYPERPARAMETER TUNING FOR STRONGER BASELINES

To ensure strong and fair baselines, we perform hyperparameter tuning for each conventional ML method using the search space provided in a public implementation<sup>9</sup>. The search spaces are manually designed to cover commonly used ranges for each model class, including both optimization-related parameters (e.g., learning rate, max iterations) and regularization or structural options (e.g., penalty, tree depth, number of neighbors). We conduct random search over these spaces and tune the models on validation datasets that are kept separate from the final test splits. The details of the hyperparameter search spaces are provided in Table F.1.

| Model               | Hyperparameter     | Type        | Log-scale | Range                                    |
|---------------------|--------------------|-------------|-----------|------------------------------------------|
| Logistic Regression | max_iter           | int         | no        | {50, 100, 200, 500, 1000}                |
|                     | solver             | categorical | no        | {newton-cg, lbfgs, liblinear, sag, saga} |
|                     | fit_intercept      | boolean     | no        | {True, False}                            |
|                     | penalty            | categorical | no        | {l1, l2, elasticnet, none}               |
|                     | C                  | float       | no        | {0.1, 1.0, 10.0, 100.0}                  |
| Random Forest       | n_estimators       | int         | no        | {10, 50, 100, 200, 500}                  |
|                     | criterion          | categorical | no        | {gini, entropy}                          |
|                     | probability        | boolean     | no        | {True}                                   |
|                     | max_depth          | int / None  | no        | {None, 10, 50, 100, 200}                 |
|                     | min_samples_split  | int         | no        | {2, 5, 10}                               |
|                     | min_samples_leaf   | int         | no        | {1, 2, 4}                                |
|                     | max_features       | categorical | no        | {auto, sqrt, log2}                       |
| SVM                 | C                  | float       | no        | {0.1, 1.0, 10.0, 100.0}                  |
|                     | kernel             | categorical | no        | {linear, poly, rbf, sigmoid}             |
|                     | probability        | boolean     | no        | {True}                                   |
|                     | degree             | int         | no        | {2, 3, 4, 5}                             |
|                     | gamma              | categorical | no        | {scale, auto}                            |
| MLP                 | max_iter           | int         | no        | {50, 100, 200, 500, 1000}                |
|                     | activation         | categorical | no        | {identity, logistic, tanh, relu}         |
|                     | solver             | categorical | no        | {lbfgs, SGD, adam}                       |
|                     | alpha              | float       | no        | {0.0001, 0.001, 0.01, 0.1}               |
|                     | learning_rate      | categorical | no        | {constant, invscaling, adaptive}         |
|                     | learning_rate_init | float       | no        | {0.001, 0.01, 0.1}                       |
| kNN                 | n_neighbors        | int         | no        | {3, 5, 11, 19}                           |
|                     | weights            | categorical | no        | {uniform, distance}                      |
|                     | algorithm          | categorical | no        | {auto, ball_tree, kd_tree, brute}        |
|                     | leaf_size          | int         | no        | {30, 50, 100}                            |
|                     | p                  | int         | no        | {1, 2}                                   |
| XGBoost             | n_estimators       | int         | no        | {50, 100, 200}                           |
|                     | max_depth          | int         | no        | {6, 10, 15, 20}                          |
|                     | learning_rate      | float       | no        | {0.001, 0.01, 0.1}                       |
|                     | subsample          | float       | no        | {0.5, 0.6, 0.7, 0.8, 0.9, 1.0}           |
|                     | colsample_bytree   | float       | no        | {0.4, 0.5, ..., 1.0}                     |
|                     | colsample_bylevel  | float       | no        | {0.4, 0.5, ..., 1.0}                     |
| LightGBM            | n_estimators       | int         | no        | {50, 100, 200}                           |
|                     | max_depth          | int         | no        | {6, 10, 15, 20}                          |
|                     | learning_rate      | float       | no        | {0.001, 0.01, 0.1}                       |
|                     | num_leaves         | int         | no        | {31, 60, 120, 240, 480, 960}             |
|                     | min_child_samples  | int         | no        | {10, 20, 30, 40, 50}                     |
| CatBoost            | iterations         | int         | no        | {50, 100, 200}                           |
|                     | depth              | int         | no        | {6, 8, 10}                               |
|                     | learning_rate      | float       | no        | {0.001, 0.01, 0.1}                       |
|                     | l2_leaf_reg        | float       | no        | {1, 3, 5, 7, 9}                          |

Table F.1: **Hyperparameter search spaces for each conventional ML baseline.** All hyperparameter values are tuned via random search over manually defined discrete sets.

<sup>9</sup><https://github.com/carteakey/tabpfn-eval>

## G DATASET STATISTICS

We evaluate on 253 tabular datasets from OpenML (Bischl et al., 2017). Summary statistics for all datasets are provided in Table G.1, G.2, and G.3. Each dataset is described using the following attributes: the dataset name (**Name**), the total number of input features (**#Features**), the number of categorical features among them (**#Cat. Feat.**), the number of data instances (**#Instances**), the number of class labels (**#Classes**), the number of missing values (**#NaNs**), and the number of samples belonging to the smallest class (**Minority Class Size**).

| Name                                                                                         | #Features | #Cat. Feat. | #Instances | #Classes | #NaNs | Minority Class Size |
|----------------------------------------------------------------------------------------------|-----------|-------------|------------|----------|-------|---------------------|
| pollen                                                                                       | 6         | 1           | 3848       | 2        | 0     | 1924                |
| Sick_numeric                                                                                 | 30        | 1           | 3772       | 2        | 0     | 231                 |
| jungle_chess_2pcs_endgame_rat_rat                                                            | 47        | 27          | 3660       | 2        | 0     | 1605                |
| UCI_churn                                                                                    | 21        | 1           | 3333       | 2        | 0     | 483                 |
| led24                                                                                        | 25        | 25          | 3200       | 10       | 0     | 296                 |
| led7                                                                                         | 8         | 8           | 3200       | 10       | 0     | 270                 |
| kr-vs-kp                                                                                     | 37        | 37          | 3196       | 2        | 0     | 1527                |
| splice                                                                                       | 61        | 61          | 3190       | 3        | 0     | 767                 |
| space_ga                                                                                     | 7         | 1           | 3107       | 2        | 0     | 1541                |
| StackOverflow-polarity-train                                                                 | 2         | 1           | 3097       | 3        | 0     | 842                 |
| seismic-bumps                                                                                | 19        | 5           | 2584       | 2        | 0     | 170                 |
| ozone-level-8hr                                                                              | 73        | 1           | 2534       | 2        | 0     | 160                 |
| jungle_chess_2pcs_endgame_lion_lion                                                          | 47        | 27          | 2352       | 2        | 0     | 949                 |
| jungle_chess_2pcs_endgame_elephant_elephant                                                  | 47        | 27          | 2351       | 2        | 0     | 1035                |
| segment                                                                                      | 20        | 1           | 2310       | 7        | 0     | 330                 |
| Titanic                                                                                      | 4         | 1           | 2201       | 2        | 0     | 711                 |
| quake                                                                                        | 4         | 1           | 2178       | 2        | 0     | 969                 |
| kc1                                                                                          | 22        | 1           | 2109       | 2        | 0     | 326                 |
| balloon                                                                                      | 2         | 1           | 2001       | 2        | 0     | 482                 |
| mfeat-fourier                                                                                | 77        | 1           | 2000       | 10       | 0     | 200                 |
| ozone-level-8hr_seed_0_nrows_2000.nclasses_10.ncols_100.stratify.True                        | 73        | 1           | 2000       | 2        | 0     | 126                 |
| mfeat_karluenen                                                                              | 65        | 1           | 2000       | 10       | 0     | 200                 |
| jannis_seed_0_nrows_2000.nclasses_10.ncols_100.stratify.True                                 | 55        | 1           | 2000       | 2        | 0     | 1000                |
| coverttype_seed_0_nrows_2000.nclasses_10.ncols_100.stratify.True                             | 55        | 45          | 2000       | 2        | 0     | 1000                |
| first-order-theorem-proving_seed_0_nrows_2000.nclasses_10.ncols_100.stratify.True            | 52        | 1           | 2000       | 6        | 0     | 159                 |
| MiniBooNE_seed_0_nrows_2000.nclasses_10.ncols_100.stratify.True                              | 51        | 1           | 2000       | 2        | 0     | 1000                |
| KDDCup09_upselling_seed_0_nrows_2000.nclasses_10.ncols_100.stratify.True                     | 50        | 16          | 2000       | 2        | 0     | 1000                |
| ada_seed_0_nrows_2000.nclasses_10.ncols_100.stratify.True                                    | 49        | 1           | 2000       | 2        | 0     | 496                 |
| mfeat-zernike                                                                                | 48        | 1           | 2000       | 10       | 0     | 200                 |
| connect-4_seed_0_nrows_2000.nclasses_10.ncols_100.stratify.True                              | 43        | 43          | 2000       | 3        | 0     | 191                 |
| kr-vs-kp_seed_0_nrows_2000.nclasses_10.ncols_100.stratify.True                               | 37        | 37          | 2000       | 2        | 0     | 956                 |
| road-safety_seed_0_nrows_2000.nclasses_10.ncols_100.stratify.True                            | 33        | 4           | 2000       | 2        | 0     | 1000                |
| GesturePhaseSegmentationProcessed_seed_0_nrows_2000.nclasses_10.ncols_100.stratify.True      | 33        | 1           | 2000       | 5        | 0     | 202                 |
| PhishingWebsites_seed_0_nrows_2000.nclasses_10.ncols_100.stratify.True                       | 31        | 31          | 2000       | 2        | 0     | 886                 |
| pol_seed_0_nrows_2000.nclasses_10.ncols_100.stratify.True                                    | 27        | 1           | 2000       | 2        | 0     | 1000                |
| Higgs_seed_0_nrows_2000.nclasses_10.ncols_100.stratify.True                                  | 25        | 1           | 2000       | 2        | 0     | 1000                |
| eye_movements_seed_0_nrows_2000.nclasses_10.ncols_100.stratify.True                          | 24        | 4           | 2000       | 2        | 0     | 1000                |
| numera128.6_seed_0_nrows_2000.nclasses_10.ncols_100.stratify.True                            | 22        | 1           | 2000       | 2        | 0     | 990                 |
| kc1_seed_0_nrows_2000.nclasses_10.ncols_100.stratify.True                                    | 22        | 1           | 2000       | 2        | 0     | 309                 |
| kdd_ipums_la_97_small_seed_0_nrows_2000.nclasses_10.ncols_100.stratify.True                  | 21        | 1           | 2000       | 2        | 0     | 1000                |
| churn_seed_0_nrows_2000.nclasses_10.ncols_100.stratify.True                                  | 21        | 5           | 2000       | 2        | 0     | 283                 |
| compass_seed_0_nrows_2000.nclasses_10.ncols_100.stratify.True                                | 18        | 10          | 2000       | 2        | 0     | 1000                |
| house_16H_seed_0_nrows_2000.nclasses_10.ncols_100.stratify.True                              | 17        | 1           | 2000       | 2        | 0     | 1000                |
| segment_seed_0_nrows_2000.nclasses_10.ncols_100.stratify.True                                | 17        | 1           | 2000       | 7        | 0     | 285                 |
| adult_seed_0_nrows_2000.nclasses_10.ncols_100.stratify.True                                  | 15        | 9           | 2000       | 2        | 242   | 479                 |
| adult_seed_1_nrows_2000.nclasses_10.ncols_100.stratify.True                                  | 15        | 9           | 2000       | 2        | 248   | 479                 |
| adult_seed_2_nrows_2000.nclasses_10.ncols_100.stratify.True                                  | 15        | 9           | 2000       | 2        | 279   | 479                 |
| adult_seed_3_nrows_2000.nclasses_10.ncols_100.stratify.True                                  | 15        | 9           | 2000       | 2        | 254   | 479                 |
| adult_seed_4_nrows_2000.nclasses_10.ncols_100.stratify.True                                  | 15        | 9           | 2000       | 2        | 253   | 479                 |
| rl_seed_0_nrows_2000.nclasses_10.ncols_100.stratify.True                                     | 13        | 8           | 2000       | 2        | 0     | 1000                |
| wine_seed_0_nrows_2000.nclasses_10.ncols_100.stratify.True                                   | 12        | 1           | 2000       | 2        | 0     | 1000                |
| Click_prediction_small_seed_0_nrows_2000.nclasses_10.ncols_100.stratify.True                 | 12        | 7           | 2000       | 2        | 0     | 337                 |
| Amazon_employee_access_seed_0_nrows_2000.nclasses_10.ncols_100.stratify.True                 | 10        | 10          | 2000       | 2        | 0     | 116                 |
| california_seed_0_nrows_2000.nclasses_10.ncols_100.stratify.True                             | 9         | 1           | 2000       | 2        | 0     | 1000                |
| sf-police-incidents_seed_0_nrows_2000.nclasses_10.ncols_100.stratify.True                    | 9         | 6           | 2000       | 2        | 0     | 243                 |
| electricity_seed_0_nrows_2000.nclasses_10.ncols_100.stratify.True                            | 8         | 1           | 2000       | 2        | 0     | 1000                |
| airlines_seed_0_nrows_2000.nclasses_10.ncols_100.stratify.True                               | 8         | 5           | 2000       | 2        | 0     | 891                 |
| mfeat-morphological                                                                          | 7         | 1           | 2000       | 10       | 0     | 200                 |
| jungle_chess_2pcs_raw_endgame_complete_seed_0_nrows_2000.nclasses_10.ncols_100.stratify.True | 7         | 1           | 2000       | 3        | 0     | 194                 |
| phoneme_seed_0_nrows_2000.nclasses_10.ncols_100.stratify.True                                | 6         | 1           | 2000       | 2        | 0     | 1000                |
| wilt_seed_0_nrows_2000.nclasses_10.ncols_100.stratify.True                                   | 6         | 1           | 2000       | 2        | 0     | 108                 |
| steel-plates-fault                                                                           | 34        | 1           | 1941       | 2        | 0     | 673                 |
| steel-plates-fault_seed_0_nrows_2000.nclasses_10.ncols_100.stratify.True                     | 28        | 1           | 1941       | 7        | 0     | 55                  |
| GAMETES_Epistasis_2-Way_20atts_0.1H_EDM-1-1                                                  | 21        | 21          | 1600       | 2        | 0     | 800                 |
| pc3                                                                                          | 38        | 1           | 1563       | 2        | 0     | 160                 |
| cmc                                                                                          | 10        | 8           | 1473       | 3        | 0     | 333                 |
| cmc_seed_0_nrows_2000.nclasses_10.ncols_100.stratify.True                                    | 10        | 8           | 1473       | 3        | 0     | 333                 |
| ibm-employee-performance                                                                     | 34        | 1           | 1470       | 2        | 0     | 226                 |
| pc4                                                                                          | 38        | 1           | 1458       | 2        | 0     | 178                 |
| pc4_seed_0_nrows_2000.nclasses_10.ncols_100.stratify.True                                    | 38        | 1           | 1458       | 2        | 0     | 178                 |
| banknote-authentication                                                                      | 5         | 1           | 1372       | 2        | 0     | 610                 |
| analcadata_halloffame                                                                        | 17        | 2           | 1340       | 2        | 20    | 125                 |
| mofn-3-7-10                                                                                  | 11        | 11          | 1324       | 2        | 0     | 292                 |
| socmob                                                                                       | 6         | 5           | 1156       | 2        | 0     | 256                 |
| parity5_plus_5                                                                               | 11        | 11          | 1124       | 2        | 0     | 557                 |
| PieChart3                                                                                    | 38        | 1           | 1077       | 2        | 0     | 134                 |
| qsar-biodeg                                                                                  | 42        | 1           | 1055       | 2        | 0     | 356                 |
| qsar-biodeg_seed_0_nrows_2000.nclasses_10.ncols_100.stratify.True                            | 42        | 1           | 1055       | 2        | 0     | 356                 |
| PizzaCutter3                                                                                 | 38        | 1           | 1043       | 2        | 0     | 127                 |
| rmfisa_sleepdata                                                                             | 3         | 1           | 1024       | 4        | 0     | 94                  |
| credit-g                                                                                     | 21        | 14          | 1000       | 2        | 0     | 300                 |
| dummy                                                                                        | 7         | 1           | 1000       | 2        | 0     | 273                 |
| xd6                                                                                          | 10        | 10          | 973        | 2        | 0     | 322                 |
| tokyo1                                                                                       | 45        | 3           | 959        | 2        | 0     | 346                 |
| tic-tac-toe                                                                                  | 10        | 10          | 958        | 2        | 0     | 332                 |
| Tour-and-Travels-Customer-Churn-Prediction                                                   | 7         | 5           | 954        | 2        | 60    | 224                 |
| stock                                                                                        | 10        | 1           | 950        | 2        | 0     | 462                 |
| vehicle                                                                                      | 19        | 1           | 846        | 4        | 0     | 199                 |
| vehicle_reproduced                                                                           | 19        | 1           | 846        | 4        | 0     | 199                 |
| analcadata_authorship                                                                        | 71        | 1           | 841        | 4        | 0     | 55                  |

Table G.1: Dataset statistics - Part 1

| Name                                                                                   | #Features | #Cat. Feat. | #Instances | #Classes | #NaNs | Minority Class Size |
|----------------------------------------------------------------------------------------|-----------|-------------|------------|----------|-------|---------------------|
| analcatdata_dmft                                                                       | 5         | 5           | 797        | 6        | 0     | 123                 |
| diabetes                                                                               | 9         | 1           | 768        | 2        | 0     | 268                 |
| blood-transfusion-service-center                                                       | 5         | 1           | 748        | 2        | 0     | 178                 |
| blood-transfusion-service-center_seed_0_nrows_2000_nclasses_10_ncols_100_stratify_True | 5         | 1           | 748        | 2        | 0     | 178                 |
| doa_bwin_balanced                                                                      | 14        | 3           | 708        | 2        | 0     | 354                 |
| PieChart1                                                                              | 38        | 1           | 705        | 2        | 0     | 61                  |
| breast-w                                                                               | 10        | 1           | 699        | 2        | 16    | 241                 |
| credit-approval                                                                        | 16        | 10          | 690        | 2        | 67    | 307                 |
| credit-approval_reproduced                                                             | 16        | 10          | 690        | 2        | 67    | 307                 |
| Australian                                                                             | 15        | 9           | 690        | 2        | 0     | 307                 |
| Australian_seed_0_nrows_2000_nclasses_10_ncols_100_stratify_True                       | 15        | 9           | 690        | 2        | 0     | 307                 |
| disclosure_x_bias                                                                      | 4         | 1           | 662        | 2        | 0     | 317                 |
| disclosure_x_tampered                                                                  | 4         | 1           | 662        | 2        | 0     | 327                 |
| disclosure_x_noise                                                                     | 4         | 1           | 662        | 2        | 0     | 329                 |
| disclosure_z                                                                           | 4         | 1           | 662        | 2        | 0     | 314                 |
| PizzaCutter1                                                                           | 38        | 1           | 661        | 2        | 0     | 52                  |
| balance-scale                                                                          | 5         | 1           | 625        | 3        | 0     | 49                  |
| monks-problems-2                                                                       | 7         | 7           | 601        | 2        | 0     | 206                 |
| monks-problems-1                                                                       | 61        | 1           | 600        | 6        | 0     | 100                 |
| synthetic_control                                                                      | 12        | 12          | 576        | 2        | 0     | 239                 |
| sensor                                                                                 | 31        | 1           | 569        | 2        | 0     | 212                 |
| wdbc                                                                                   | 5         | 2           | 559        | 2        | 0     | 80                  |
| arsenic-female-bladder                                                                 | 7         | 7           | 556        | 2        | 0     | 278                 |
| monks-problems-3                                                                       | 7         | 7           | 554        | 2        | 0     | 266                 |
| climate-model-simulation-crashes                                                       | 21        | 1           | 540        | 2        | 0     | 46                  |
| climate-model-simulation-crashes                                                       | 14        | 3           | 530        | 2        | 0     | 176                 |
| CPMP-2015-runtime-classification                                                       | 23        | 1           | 527        | 4        | 0     | 78                  |
| kc2                                                                                    | 22        | 1           | 522        | 2        | 0     | 107                 |
| threeOf9                                                                               | 10        | 10          | 512        | 2        | 0     | 238                 |
| rmftsa_ladata                                                                          | 11        | 1           | 508        | 2        | 0     | 222                 |
| boston_corrected                                                                       | 21        | 4           | 506        | 2        | 0     | 223                 |
| boston                                                                                 | 14        | 2           | 506        | 2        | 0     | 209                 |
| collins                                                                                | 23        | 3           | 500        | 2        | 0     | 80                  |
| pm10                                                                                   | 8         | 1           | 500        | 2        | 0     | 246                 |
| no2                                                                                    | 8         | 1           | 500        | 2        | 0     | 249                 |
| LED-display-domain-7digit                                                              | 8         | 1           | 500        | 10       | 0     | 37                  |
| irish                                                                                  | 6         | 4           | 500        | 2        | 32    | 222                 |
| PopularKids                                                                            | 11        | 5           | 478        | 3        | 0     | 90                  |
| analcatdata_apnea2                                                                     | 4         | 3           | 475        | 2        | 0     | 64                  |
| analcatdata_apnea1                                                                     | 4         | 3           | 475        | 2        | 0     | 61                  |
| thoracic-surgery                                                                       | 17        | 14          | 470        | 2        | 0     | 70                  |
| analcatdata_vineyard                                                                   | 4         | 2           | 468        | 2        | 0     | 208                 |
| chscase_vine2                                                                          | 3         | 1           | 468        | 2        | 0     | 212                 |
| sa-heart                                                                               | 10        | 2           | 462        | 2        | 0     | 160                 |
| analcatdata_apnea3                                                                     | 4         | 3           | 450        | 2        | 0     | 55                  |
| wholesale-customers                                                                    | 9         | 2           | 440        | 2        | 0     | 142                 |
| mw1                                                                                    | 38        | 1           | 403        | 2        | 0     | 31                  |
| user-knowledge                                                                         | 6         | 1           | 403        | 5        | 0     | 24                  |
| chscase_census5                                                                        | 8         | 1           | 400        | 2        | 0     | 193                 |
| chscase_census4                                                                        | 8         | 1           | 400        | 2        | 0     | 194                 |
| chscase_census3                                                                        | 8         | 1           | 400        | 2        | 0     | 192                 |
| chscase_census2                                                                        | 8         | 1           | 400        | 2        | 0     | 197                 |
| chscase_census6                                                                        | 7         | 1           | 400        | 2        | 0     | 165                 |
| analcatdata_germangss                                                                  | 6         | 5           | 400        | 4        | 0     | 100                 |
| calendarDOW                                                                            | 33        | 21          | 399        | 5        | 0     | 44                  |
| autoMpg                                                                                | 8         | 4           | 398        | 2        | 6     | 189                 |
| vinnie                                                                                 | 3         | 1           | 380        | 2        | 0     | 185                 |
| jEdit_4.2.4.3                                                                          | 9         | 1           | 369        | 2        | 0     | 165                 |
| dermatology                                                                            | 35        | 34          | 366        | 6        | 8     | 20                  |
| analcatdata_draft                                                                      | 5         | 3           | 366        | 2        | 1     | 32                  |
| analcatdata_birthday                                                                   | 4         | 3           | 365        | 2        | 30    | 53                  |
| ionosphere                                                                             | 35        | 1           | 351        | 2        | 0     | 126                 |
| SPECTF                                                                                 | 45        | 1           | 349        | 2        | 0     | 95                  |
| penguins                                                                               | 7         | 3           | 344        | 3        | 18    | 68                  |
| CastMetal1                                                                             | 38        | 1           | 327        | 2        | 0     | 42                  |
| visualizing-galaxy                                                                     | 5         | 1           | 323        | 2        | 0     | 148                 |
| plasma_retinol                                                                         | 14        | 4           | 315        | 2        | 0     | 133                 |
| solar-flare                                                                            | 13        | 13          | 315        | 5        | 0     | 21                  |
| diggle_table_a2                                                                        | 9         | 1           | 310        | 9        | 0     | 18                  |
| vertebra-column                                                                        | 7         | 1           | 310        | 3        | 0     | 60                  |
| haberman                                                                               | 4         | 2           | 306        | 2        | 0     | 81                  |
| heart-c                                                                                | 14        | 8           | 303        | 2        | 7     | 138                 |
| cleveland                                                                              | 14        | 8           | 303        | 2        | 6     | 139                 |
| cholesterol                                                                            | 14        | 8           | 303        | 2        | 6     | 137                 |
| cleve                                                                                  | 14        | 9           | 303        | 2        | 0     | 138                 |
| cleveland-nominal                                                                      | 8         | 8           | 303        | 5        | 0     | 13                  |
| CostaMadr1                                                                             | 38        | 1           | 296        | 2        | 0     | 38                  |
| Heart_disease_prediction_20                                                            | 14        | 1           | 296        | 2        | 0     | 137                 |
| breast-cancer                                                                          | 10        | 10          | 286        | 2        | 9     | 85                  |
| breastTumor                                                                            | 10        | 9           | 286        | 2        | 9     | 120                 |
| analcatdata_broadwaymult                                                               | 8         | 5           | 285        | 7        | 27    | 21                  |
| mu284                                                                                  | 11        | 1           | 284        | 2        | 0     | 142                 |
| DiabeticMellitus                                                                       | 98        | 1           | 281        | 2        | 2     | 99                  |
| breast-cancer-dropped-missing-attributes-values                                        | 10        | 10          | 277        | 2        | 0     | 81                  |
| jEdit_4.0.4.2                                                                          | 9         | 1           | 274        | 2        | 0     | 134                 |
| heart-statlog                                                                          | 14        | 1           | 270        | 2        | 0     | 120                 |
| SPECT                                                                                  | 23        | 23          | 267        | 2        | 0     | 55                  |
| Touch2                                                                                 | 11        | 1           | 265        | 8        | 0     | 27                  |
| analcatdata_lawsuit                                                                    | 5         | 2           | 264        | 2        | 0     | 19                  |
| rmftsa_ctoarrivals                                                                     | 3         | 2           | 264        | 2        | 0     | 101                 |

Table G.2: Dataset statistics - Part 2



| Name                                             | #Features | #Cat. Feat. | #Instances | #Classes | #NaNs | Minority Class Size |
|--------------------------------------------------|-----------|-------------|------------|----------|-------|---------------------|
| MegaWatt1                                        | 38        | 1           | 253        | 2        | 0     | 27                  |
| bodyfat                                          | 15        | 1           | 252        | 2        | 0     | 124                 |
| qualitative-bankruptcy                           | 7         | 7           | 250        | 2        | 0     | 107                 |
| prnn_synth                                       | 3         | 1           | 250        | 2        | 0     | 125                 |
| conference.attendance                            | 7         | 7           | 246        | 2        | 0     | 31                  |
| chatfield.4                                      | 13        | 1           | 235        | 2        | 0     | 93                  |
| chscase_whale                                    | 9         | 1           | 228        | 2        | 20    | 111                 |
| lungcancer.GSE31210                              | 24        | 3           | 226        | 2        | 0     | 35                  |
| chscase_geyser1                                  | 3         | 1           | 222        | 2        | 0     | 88                  |
| thyroid-new                                      | 6         | 1           | 215        | 3        | 0     | 30                  |
| glass                                            | 10        | 1           | 214        | 6        | 0     | 9                   |
| prnn_fglass                                      | 10        | 1           | 214        | 2        | 0     | 76                  |
| seeds                                            | 8         | 1           | 210        | 3        | 0     | 70                  |
| biomed                                           | 9         | 2           | 209        | 2        | 15    | 75                  |
| cpu                                              | 8         | 2           | 209        | 2        | 0     | 53                  |
| machine_cpu                                      | 7         | 1           | 209        | 2        | 0     | 56                  |
| sonar                                            | 61        | 1           | 208        | 2        | 0     | 97                  |
| regime_alimentaire                               | 20        | 17          | 202        | 2        | 17    | 41                  |
| heart-long-beach                                 | 14        | 1           | 200        | 5        | 0     | 10                  |
| pwLinear                                         | 11        | 1           | 200        | 2        | 0     | 97                  |
| prnn_crabs                                       | 8         | 2           | 200        | 2        | 0     | 100                 |
| parkinsons                                       | 23        | 1           | 195        | 2        | 0     | 48                  |
| pharynx                                          | 11        | 10          | 195        | 2        | 2     | 74                  |
| KnuggetChase3                                    | 40        | 1           | 194        | 2        | 0     | 36                  |
| wisconsin                                        | 33        | 1           | 194        | 2        | 0     | 90                  |
| lowbwt                                           | 10        | 8           | 189        | 2        | 0     | 90                  |
| triazines                                        | 61        | 1           | 186        | 2        | 0     | 77                  |
| chscase_funds                                    | 3         | 1           | 185        | 2        | 0     | 87                  |
| planning-relax                                   | 13        | 1           | 182        | 2        | 0     | 52                  |
| Smartphone-Based_Recognition_of_Human_Activities | 68        | 2           | 180        | 6        | 0     | 30                  |
| backache                                         | 32        | 27          | 180        | 2        | 0     | 25                  |
| wine                                             | 14        | 1           | 178        | 3        | 0     | 48                  |
| servo                                            | 5         | 5           | 167        | 2        | 0     | 38                  |
| robot-failures-lp5                               | 91        | 1           | 164        | 5        | 0     | 21                  |
| analcdata_wildcat                                | 6         | 3           | 163        | 2        | 0     | 47                  |
| mc2                                              | 40        | 1           | 161        | 2        | 0     | 52                  |
| corral                                           | 7         | 7           | 160        | 2        | 0     | 70                  |
| hayes-roth                                       | 5         | 1           | 160        | 3        | 0     | 31                  |
| auto_price                                       | 16        | 2           | 159        | 2        | 0     | 54                  |
| autoPrice                                        | 16        | 1           | 159        | 2        | 0     | 54                  |
| analcdata_gsssexsurvey                           | 10        | 6           | 159        | 2        | 6     | 35                  |
| TuningSVMs                                       | 81        | 1           | 156        | 2        | 0     | 54                  |
| grub-damage                                      | 9         | 7           | 155        | 4        | 0     | 19                  |
| teachingAssistant                                | 7         | 5           | 151        | 3        | 0     | 49                  |
| tae                                              | 6         | 3           | 151        | 3        | 0     | 49                  |
| iris                                             | 5         | 1           | 150        | 3        | 0     | 50                  |
| iris-example                                     | 5         | 1           | 150        | 3        | 0     | 50                  |
| sleuth_case2002                                  | 7         | 5           | 147        | 2        | 0     | 69                  |
| kc1-top5                                         | 95        | 1           | 145        | 2        | 0     | 8                   |
| kc1-binary                                       | 95        | 1           | 145        | 2        | 0     | 60                  |
| newton_hema                                      | 4         | 2           | 140        | 2        | 0     | 70                  |
| veteran                                          | 8         | 5           | 137        | 2        | 0     | 43                  |
| analcdata_boxing2                                | 4         | 4           | 132        | 2        | 0     | 61                  |
| analcdata_seropositive                           | 4         | 2           | 132        | 2        | 0     | 46                  |
| transplant                                       | 4         | 1           | 131        | 2        | 0     | 48                  |
| datatrive                                        | 9         | 1           | 130        | 2        | 0     | 11                  |
| visualizing_livestock                            | 3         | 2           | 130        | 5        | 0     | 26                  |
| humandevl                                        | 2         | 1           | 130        | 2        | 0     | 65                  |
| mux6                                             | 7         | 7           | 128        | 2        | 0     | 64                  |
| MindCave2                                        | 40        | 1           | 125        | 2        | 0     | 44                  |
| fruitfly                                         | 5         | 3           | 125        | 2        | 0     | 49                  |
| KungChi3                                         | 40        | 1           | 123        | 2        | 0     | 16                  |
| heart-switzerland                                | 13        | 1           | 123        | 5        | 0     | 5                   |
| ar1                                              | 30        | 1           | 121        | 2        | 0     | 9                   |
| analcdata_boxing1                                | 4         | 4           | 120        | 2        | 0     | 42                  |
| rabe_266                                         | 3         | 1           | 120        | 2        | 0     | 57                  |
| robot-failures-lp4                               | 91        | 1           | 117        | 3        | 0     | 21                  |
| visualizing_environmental                        | 4         | 1           | 111        | 2        | 0     | 53                  |
| cloud                                            | 8         | 2           | 108        | 2        | 0     | 32                  |
| analcdata_michiganacc                            | 4         | 3           | 108        | 2        | 0     | 48                  |
| ar4                                              | 30        | 1           | 107        | 2        | 0     | 20                  |
| molecular-biology_promoters                      | 58        | 58          | 106        | 2        | 0     | 53                  |
| breast-tissue                                    | 10        | 1           | 106        | 6        | 0     | 14                  |
| ar6                                              | 30        | 1           | 101        | 2        | 0     | 15                  |
| zoo                                              | 17        | 16          | 101        | 7        | 0     | 4                   |
| fertility                                        | 10        | 1           | 100        | 2        | 0     | 12                  |
| analcdata_creditscore                            | 7         | 4           | 100        | 2        | 0     | 27                  |
| blogger                                          | 6         | 6           | 100        | 2        | 0     | 32                  |
| analcdata_chlamydia                              | 4         | 4           | 100        | 2        | 0     | 19                  |
| analcdata_neavote                                | 3         | 2           | 100        | 2        | 0     | 7                   |

Table G.3: Dataset statistics - Part 3

## H K-MEANS CLUSTERING FOR DATASET SELECTION

Table H.1 reports the extended results of our K-means clustering-based training set selection under different numbers of clusters  $K \in \{3, 5, 10\}$ , where a proportion ( $P \in \{0.05, 0.10, 0.20\}$ ) of samples is drawn from each cluster. Across all settings, our method demonstrates stable performance regardless of  $K$ , confirming its robustness when applied with clustering-based selection.

| $K$ | $P$  | Methods   | w/o shift | Shift strength ( $\beta$ ) |              |              |              |              |              |              |
|-----|------|-----------|-----------|----------------------------|--------------|--------------|--------------|--------------|--------------|--------------|
|     |      |           |           | 0.0                        | 0.1          | 0.5          | 1.0          | 2.0          | 5.0          | Avg.         |
| 3   | 0.05 | TabPFN-v2 | 0.668     | 0.596                      | 0.591        | 0.548        | 0.500        | 0.439        | 0.408        | 0.513        |
|     |      | DistPFN   | 0.661     | <u>0.622</u>               | <u>0.614</u> | <u>0.579</u> | <u>0.532</u> | <u>0.454</u> | <u>0.428</u> | <u>0.538</u> |
|     |      | DistPFN-T | 0.657     | <b>0.625</b>               | <b>0.616</b> | <b>0.588</b> | <b>0.540</b> | <b>0.459</b> | <b>0.433</b> | <b>0.543</b> |
|     | 0.10 | TabPFN-v2 | 0.699     | 0.626                      | 0.632        | 0.570        | 0.528        | 0.465        | 0.424        | 0.541        |
|     |      | DistPFN   | 0.692     | <u>0.641</u>               | <u>0.653</u> | <u>0.620</u> | <u>0.564</u> | <u>0.498</u> | <u>0.450</u> | <u>0.573</u> |
|     |      | DistPFN-T | 0.687     | <b>0.643</b>               | <b>0.657</b> | <b>0.628</b> | <b>0.569</b> | <b>0.504</b> | <b>0.454</b> | <b>0.584</b> |
|     | 0.20 | TabPFN-v2 | 0.732     | 0.673                      | 0.668        | 0.626        | 0.576        | 0.505        | 0.468        | 0.591        |
|     |      | DistPFN   | 0.727     | <u>0.692</u>               | <u>0.688</u> | <u>0.669</u> | <u>0.614</u> | <u>0.556</u> | <u>0.509</u> | <u>0.639</u> |
|     |      | DistPFN-T | 0.722     | <b>0.691</b>               | <b>0.692</b> | <b>0.674</b> | <b>0.620</b> | <b>0.568</b> | <b>0.516</b> | <b>0.661</b> |
| 5   | 0.05 | TabPFN-v2 | 0.676     | 0.605                      | 0.606        | 0.550        | 0.503        | 0.459        | 0.429        | 0.529        |
|     |      | DistPFN   | 0.673     | <u>0.628</u>               | <u>0.630</u> | <u>0.587</u> | <u>0.534</u> | <u>0.487</u> | <u>0.453</u> | <u>0.561</u> |
|     |      | DistPFN-T | 0.672     | <b>0.629</b>               | <b>0.634</b> | <b>0.594</b> | <b>0.539</b> | <b>0.493</b> | <b>0.460</b> | <b>0.565</b> |
|     | 0.10 | TabPFN-v2 | 0.699     | 0.631                      | 0.644        | 0.586        | 0.540        | 0.485        | 0.446        | 0.569        |
|     |      | DistPFN   | 0.696     | <u>0.654</u>               | <u>0.665</u> | <u>0.624</u> | <u>0.583</u> | <u>0.528</u> | <u>0.475</u> | <u>0.609</u> |
|     |      | DistPFN-T | 0.693     | <b>0.655</b>               | <b>0.670</b> | <b>0.630</b> | <b>0.591</b> | <b>0.538</b> | <b>0.483</b> | <b>0.620</b> |
|     | 0.20 | TabPFN-v2 | 0.732     | 0.670                      | 0.679        | 0.628        | 0.582        | 0.523        | 0.481        | 0.618        |
|     |      | DistPFN   | 0.736     | <u>0.687</u>               | <u>0.697</u> | <u>0.662</u> | <u>0.625</u> | <u>0.576</u> | <u>0.521</u> | <u>0.645</u> |
|     |      | DistPFN-T | 0.731     | <b>0.690</b>               | <b>0.698</b> | <b>0.670</b> | <b>0.631</b> | <b>0.584</b> | <b>0.531</b> | <b>0.667</b> |
| 10  | 0.05 | TabPFN-v2 | 0.708     | 0.644                      | 0.639        | 0.591        | 0.547        | 0.505        | 0.460        | 0.554        |
|     |      | DistPFN   | 0.706     | <u>0.659</u>               | <u>0.662</u> | <u>0.627</u> | <u>0.586</u> | <u>0.548</u> | <u>0.493</u> | <u>0.589</u> |
|     |      | DistPFN-T | 0.701     | <b>0.662</b>               | <b>0.667</b> | <b>0.640</b> | <b>0.601</b> | <b>0.562</b> | <b>0.504</b> | <b>0.605</b> |
|     | 0.10 | TabPFN-v2 | 0.727     | 0.663                      | 0.664        | 0.617        | 0.582        | 0.534        | 0.481        | 0.620        |
|     |      | DistPFN   | 0.723     | <u>0.679</u>               | <u>0.685</u> | <u>0.650</u> | <u>0.618</u> | <u>0.577</u> | <u>0.515</u> | <u>0.642</u> |
|     |      | DistPFN-T | 0.718     | <b>0.685</b>               | <b>0.691</b> | <b>0.656</b> | <b>0.629</b> | <b>0.588</b> | <b>0.527</b> | <b>0.652</b> |
|     | 0.20 | TabPFN-v2 | 0.749     | 0.697                      | 0.689        | 0.651        | 0.619        | 0.561        | 0.510        | 0.638        |
|     |      | DistPFN   | 0.749     | <u>0.713</u>               | <u>0.711</u> | <u>0.682</u> | <u>0.663</u> | <u>0.610</u> | <u>0.553</u> | <u>0.676</u> |
|     |      | DistPFN-T | 0.748     | <b>0.716</b>               | <b>0.715</b> | <b>0.689</b> | <b>0.670</b> | <b>0.620</b> | <b>0.563</b> | <b>0.688</b> |

Table H.1: **K-Means-based training dataset selection.** Our method remains effective when training subsets are selected by clustering the data and sampling a percentage ( $P$ ) of samples from each of  $K$  clusters.

## I APPLICATION TO LoCALPFN

Table I.1 provides the full results for LoCalPFN under different values of  $k$  across six  $\beta$  values. The results confirm that our methods yield consistent improvements regardless of the choice of  $k$ , demonstrating robustness of the approach.

| $k$ | Methods     | Shift strength ( $\beta$ ) |              |              |              |              |              | Avg.         |
|-----|-------------|----------------------------|--------------|--------------|--------------|--------------|--------------|--------------|
|     |             | 0.0                        | 0.1          | 0.5          | 1.0          | 2.0          | 5.0          |              |
| 3   | LoCalPFN    | 0.789                      | 0.787        | 0.774        | 0.758        | 0.711        | 0.679        | 0.750        |
|     | + DistPFN   | <u>0.794</u>               | <u>0.794</u> | <u>0.792</u> | <u>0.786</u> | <u>0.772</u> | <u>0.752</u> | <u>0.782</u> |
|     | + DistPFN-T | <b>0.794</b>               | <b>0.794</b> | <b>0.794</b> | <b>0.790</b> | <b>0.779</b> | <b>0.759</b> | <b>0.785</b> |
| 5   | LoCalPFN    | 0.792                      | 0.791        | 0.785        | 0.775        | 0.744        | 0.714        | 0.767        |
|     | + DistPFN   | <u>0.794</u>               | <u>0.795</u> | <u>0.793</u> | <u>0.790</u> | <u>0.777</u> | <u>0.766</u> | <u>0.786</u> |
|     | + DistPFN-T | <b>0.795</b>               | <b>0.796</b> | <b>0.795</b> | <b>0.794</b> | <b>0.784</b> | <b>0.770</b> | <b>0.789</b> |
| 10  | LoCalPFN    | 0.794                      | 0.792        | 0.786        | 0.778        | 0.752        | 0.720        | 0.770        |
|     | + DistPFN   | <u>0.796</u>               | <u>0.795</u> | <u>0.793</u> | <u>0.791</u> | <u>0.779</u> | <u>0.768</u> | <u>0.787</u> |
|     | + DistPFN-T | <b>0.797</b>               | <b>0.797</b> | <b>0.796</b> | <b>0.794</b> | <b>0.785</b> | <b>0.774</b> | <b>0.789</b> |
| 20  | LoCalPFN    | 0.794                      | 0.793        | 0.788        | 0.778        | 0.753        | 0.719        | 0.771        |
|     | + DistPFN   | <u>0.797</u>               | <u>0.796</u> | <u>0.794</u> | <u>0.790</u> | <u>0.782</u> | <u>0.770</u> | <u>0.788</u> |
|     | + DistPFN-T | <b>0.798</b>               | <b>0.797</b> | <b>0.796</b> | <b>0.794</b> | <b>0.787</b> | <b>0.776</b> | <b>0.791</b> |

Table I.1: **Application to LoCalPFN.** DistPFN and DistPFN-T applied to LoCalPFN show consistent improvements across varying numbers of neighbors ( $k$ ).

## J COMPARISON WITH METHODS FOR LABEL SHIFT CORRECTION

To demonstrate the effectiveness of our approach, we compare it with classical methods for handling label shift by rescaling classifier outputs, which typically require estimating the test distribution: EM-based Estimation (EME) (Saerens et al., 2002) and Black-box Estimation (BBE) (Lipton et al., 2018). Table J.1 presents the results, showing that our method is effective without requiring estimation of the test prior.

| Methods     | w/o shift    | Shift strength ( $\beta$ ) |              |              |              |              |              | Avg.         |
|-------------|--------------|----------------------------|--------------|--------------|--------------|--------------|--------------|--------------|
|             |              | 0.0                        | 0.1          | 0.5          | 1.0          | 2.0          | 5.0          |              |
| LoCalPFN    | <b>0.816</b> | 0.794                      | 0.793        | 0.788        | 0.778        | 0.753        | 0.719        | 0.771        |
| + EME       | 0.801        | 0.792                      | 0.790        | 0.786        | 0.785        | 0.778        | 0.769        | 0.783        |
| + BBE       | 0.805        | <b>0.798</b>               | 0.795        | 0.792        | 0.789        | <u>0.782</u> | <u>0.770</u> | 0.787        |
| + DistPFN   | <b>0.816</b> | <u>0.797</u>               | <u>0.796</u> | <u>0.794</u> | 0.790        | <u>0.782</u> | <u>0.770</u> | <u>0.788</u> |
| + DistPFN-T | <b>0.816</b> | <b>0.798</b>               | <b>0.797</b> | <b>0.796</b> | <b>0.794</b> | <b>0.787</b> | <b>0.776</b> | <b>0.791</b> |
| TabICL      | <b>0.806</b> | 0.783                      | 0.781        | 0.770        | 0.747        | 0.704        | 0.664        | 0.742        |
| + EME       | 0.798        | 0.776                      | 0.776        | 0.770        | 0.769        | 0.761        | 0.747        | 0.766        |
| + BBE       | 0.802        | 0.783                      | 0.785        | 0.780        | 0.774        | 0.754        | 0.734        | 0.768        |
| + DistPFN   | <b>0.806</b> | <u>0.786</u>               | <u>0.786</u> | <u>0.781</u> | <u>0.776</u> | <u>0.763</u> | <u>0.746</u> | <u>0.773</u> |
| + DistPFN-T | <b>0.806</b> | <b>0.786</b>               | <b>0.786</b> | <b>0.783</b> | <b>0.780</b> | <b>0.771</b> | <b>0.755</b> | <b>0.777</b> |
| TabPFN-v2   | <b>0.818</b> | <u>0.797</u>               | 0.796        | 0.790        | 0.782        | 0.759        | 0.727        | 0.775        |
| + EME       | 0.801        | 0.793                      | 0.793        | 0.790        | 0.787        | <u>0.783</u> | 0.768        | 0.786        |
| + BBE       | 0.805        | <b>0.799</b>               | <u>0.797</u> | <b>0.797</b> | <u>0.791</u> | <u>0.783</u> | 0.768        | <u>0.789</u> |
| + DistPFN   | <b>0.818</b> | <b>0.799</b>               | <u>0.797</u> | <u>0.795</u> | <u>0.791</u> | <u>0.783</u> | <u>0.769</u> | <u>0.789</u> |
| + DistPFN-T | <b>0.818</b> | <b>0.799</b>               | <b>0.798</b> | <b>0.797</b> | <b>0.796</b> | <b>0.789</b> | <b>0.775</b> | <b>0.792</b> |

Figure J.1: Comparison with other label shift methods.

## K PREDICTED DISTRIBUTION OF SINGLE VS. MULTIPLE INSTANCES

As TabPFN produces identical predictions whether test instances are evaluated individually or in batches, DistPFN and DistPFN-T can adjust based on either 1) the prediction of a *single* instance or 2) the average prediction across *multiple* instances. As shown in Table K.1, both choices consistently improve TabPFN-v2 (Hollmann et al., 2025), averaged across six  $\beta$ s for *w/ shift*, demonstrating robustness to the choice of distribution source.

|             | Pred. distn. | w/o shift    | Shift strength ( $\beta$ ) |              |              |              |              |              |              |
|-------------|--------------|--------------|----------------------------|--------------|--------------|--------------|--------------|--------------|--------------|
|             |              |              | 0.0                        | 0.1          | 0.5          | 1.0          | 2.0          | 5.0          | Avg.         |
| TabPFN-v2   | -            | 0.818        | 0.797                      | 0.796        | 0.790        | 0.782        | 0.759        | 0.727        | 0.775        |
| + DistPFN   | Single       | <b>0.818</b> | <u>0.797</u>               | <u>0.796</u> | <b>0.795</b> | <b>0.793</b> | <b>0.784</b> | <b>0.770</b> | <b>0.789</b> |
|             | Multiple     | <b>0.818</b> | <u>0.799</u>               | <u>0.797</u> | <b>0.795</b> | <u>0.791</u> | <u>0.783</u> | <b>0.770</b> | <b>0.789</b> |
| + DistPFN-T | Single       | <b>0.818</b> | <u>0.797</u>               | <u>0.797</u> | <u>0.796</u> | <u>0.795</u> | <u>0.788</u> | <u>0.773</u> | <u>0.791</u> |
|             | Multiple     | <b>0.818</b> | <u>0.799</u>               | <u>0.798</u> | <u>0.797</u> | <u>0.796</u> | <u>0.789</u> | <u>0.775</u> | <u>0.792</u> |

Table K.1: **Predicted distributions: Single vs. Multiple.** The proposed methods consistently improves TabPFN-v2 regardless of whether the adjustment is based on single or aggregated distribution.

## L OTHER METRICS

Table L.1 reports the comparison of our methods and baselines under  $\beta = 2$  in terms of ROC-AUC, demonstrating the effectiveness of our method. The results demonstrate that our method shows nearly the same values as the backbone, as the adjustment only rescales predicted probabilities without altering their order.

| Methods          |                                       | w/o shift                                                   | Shift strength ( $\beta$ )                                  |                                                             |                                                             |                                                             |                                                             |                                                             |                         |       |
|------------------|---------------------------------------|-------------------------------------------------------------|-------------------------------------------------------------|-------------------------------------------------------------|-------------------------------------------------------------|-------------------------------------------------------------|-------------------------------------------------------------|-------------------------------------------------------------|-------------------------|-------|
|                  |                                       |                                                             | 0.0                                                         | 0.1                                                         | 0.5                                                         | 1.0                                                         | 2.0                                                         | 5.0                                                         | Avg.                    |       |
| Machine Learning | LogReg.<br>+ HPO                      | 0.813 $\pm$ 0.002<br>0.817 $\pm$ 0.002                      | 0.789 $\pm$ 0.002<br>0.806 $\pm$ 0.001                      | 0.789 $\pm$ 0.002<br>0.806 $\pm$ 0.001                      | 0.790 $\pm$ 0.002<br>0.805 $\pm$ 0.002                      | 0.788 $\pm$ 0.002<br>0.803 $\pm$ 0.002                      | 0.784 $\pm$ 0.003<br>0.797 $\pm$ 0.001                      | 0.777 $\pm$ 0.002<br>0.791 $\pm$ 0.001                      | 0.786<br>0.801          |       |
|                  | SVM<br>+ HPO                          | 0.815 $\pm$ 0.002<br>0.840 $\pm$ 0.002                      | 0.744 $\pm$ 0.004<br>0.804 $\pm$ 0.003                      | 0.747 $\pm$ 0.005<br>0.804 $\pm$ 0.003                      | 0.750 $\pm$ 0.004<br>0.800 $\pm$ 0.001                      | 0.744 $\pm$ 0.004<br>0.799 $\pm$ 0.004                      | 0.733 $\pm$ 0.005<br>0.794 $\pm$ 0.002                      | 0.725 $\pm$ 0.006<br>0.785 $\pm$ 0.002                      | 0.741<br>0.798          |       |
|                  | MLP<br>+ HPO                          | 0.821 $\pm$ 0.003<br>0.849 $\pm$ 0.003                      | 0.747 $\pm$ 0.002<br>0.799 $\pm$ 0.001                      | 0.750 $\pm$ 0.003<br>0.799 $\pm$ 0.002                      | 0.746 $\pm$ 0.005<br>0.796 $\pm$ 0.001                      | 0.735 $\pm$ 0.004<br>0.788 $\pm$ 0.003                      | 0.719 $\pm$ 0.002<br>0.781 $\pm$ 0.003                      | 0.702 $\pm$ 0.004<br>0.772 $\pm$ 0.002                      | 0.733<br>0.789          |       |
|                  | kNN<br>+ HPO                          | 0.789 $\pm$ 0.001<br>0.828 $\pm$ 0.002                      | 0.728 $\pm$ 0.003<br>0.775 $\pm$ 0.002                      | 0.728 $\pm$ 0.004<br>0.775 $\pm$ 0.003                      | 0.727 $\pm$ 0.004<br>0.773 $\pm$ 0.002                      | 0.722 $\pm$ 0.004<br>0.768 $\pm$ 0.002                      | 0.709 $\pm$ 0.003<br>0.756 $\pm$ 0.001                      | 0.693 $\pm$ 0.003<br>0.742 $\pm$ 0.002                      | 0.718<br>0.765          |       |
|                  | Random Forest<br>+ HPO                | 0.836 $\pm$ 0.003<br>0.849 $\pm$ 0.003                      | 0.824 $\pm$ 0.003<br>0.836 $\pm$ 0.003                      | 0.823 $\pm$ 0.003<br>0.835 $\pm$ 0.003                      | 0.821 $\pm$ 0.003<br>0.834 $\pm$ 0.003                      | 0.818 $\pm$ 0.002<br>0.832 $\pm$ 0.002                      | 0.812 $\pm$ 0.001<br>0.826 $\pm$ 0.001                      | 0.802 $\pm$ 0.001<br>0.818 $\pm$ 0.002                      | 0.817<br>0.830          |       |
|                  | LightGBM<br>+ HPO                     | 0.824 $\pm$ 0.002<br>0.845 $\pm$ 0.003                      | 0.813 $\pm$ 0.001<br>0.776 $\pm$ 0.009                      | 0.812 $\pm$ 0.001<br>0.767 $\pm$ 0.006                      | 0.809 $\pm$ 0.002<br>0.781 $\pm$ 0.003                      | 0.805 $\pm$ 0.003<br>0.774 $\pm$ 0.010                      | 0.797 $\pm$ 0.002<br>0.775 $\pm$ 0.009                      | 0.785 $\pm$ 0.003<br>0.779 $\pm$ 0.004                      | 0.805<br>0.775          |       |
|                  | CatBoost<br>+ HPO                     | 0.847 $\pm$ 0.003<br>0.843 $\pm$ 0.003                      | 0.833 $\pm$ 0.003<br>0.833 $\pm$ 0.003                      | 0.832 $\pm$ 0.002<br>0.832 $\pm$ 0.002                      | 0.830 $\pm$ 0.003<br>0.830 $\pm$ 0.003                      | 0.827 $\pm$ 0.002<br>0.827 $\pm$ 0.002                      | 0.820 $\pm$ 0.002<br>0.819 $\pm$ 0.002                      | 0.810 $\pm$ 0.002<br>0.810 $\pm$ 0.001                      | 0.825<br>0.825          |       |
|                  | Non-found.                            | FT-Transformer                                              | 0.821 $\pm$ 0.003                                           | 0.818 $\pm$ 0.003                                           | 0.819 $\pm$ 0.002                                           | 0.816 $\pm$ 0.003                                           | 0.812 $\pm$ 0.002                                           | 0.795 $\pm$ 0.003                                           | 0.771 $\pm$ 0.002       | 0.805 |
|                  |                                       | TabM                                                        | 0.824 $\pm$ 0.003                                           | 0.824 $\pm$ 0.003                                           | 0.824 $\pm$ 0.002                                           | 0.823 $\pm$ 0.003                                           | 0.821 $\pm$ 0.001                                           | 0.808 $\pm$ 0.003                                           | 0.791 $\pm$ 0.002       | 0.815 |
|                  |                                       | TabulaRNN                                                   | 0.774 $\pm$ 0.003                                           | 0.699 $\pm$ 0.003                                           | 0.684 $\pm$ 0.003                                           | 0.641 $\pm$ 0.004                                           | 0.585 $\pm$ 0.009                                           | 0.522 $\pm$ 0.011                                           | 0.465 $\pm$ 0.008       | 0.599 |
| MambaTab         |                                       | 0.743 $\pm$ 0.005                                           | 0.629 $\pm$ 0.006                                           | 0.603 $\pm$ 0.004                                           | 0.525 $\pm$ 0.002                                           | 0.466 $\pm$ 0.010                                           | 0.430 $\pm$ 0.005                                           | 0.394 $\pm$ 0.002                                           | 0.508                   |       |
| RealMLP          |                                       | 0.821 $\pm$ 0.002                                           | 0.805 $\pm$ 0.003                                           | 0.806 $\pm$ 0.002                                           | 0.807 $\pm$ 0.002                                           | 0.804 $\pm$ 0.003                                           | 0.795 $\pm$ 0.000                                           | 0.781 $\pm$ 0.004                                           | 0.800                   |       |
| Foundation       | LoCalPFN<br>+ DistPFN<br>+ DistPFN-T  | 0.858 $\pm$ 0.002<br>0.858 $\pm$ 0.002<br>0.858 $\pm$ 0.002 | 0.842 $\pm$ 0.002<br>0.842 $\pm$ 0.002<br>0.842 $\pm$ 0.002 | 0.840 $\pm$ 0.001<br>0.840 $\pm$ 0.002<br>0.840 $\pm$ 0.002 | 0.839 $\pm$ 0.000<br>0.839 $\pm$ 0.001<br>0.839 $\pm$ 0.001 | 0.836 $\pm$ 0.000<br>0.836 $\pm$ 0.001<br>0.837 $\pm$ 0.001 | 0.830 $\pm$ 0.000<br>0.830 $\pm$ 0.001<br>0.830 $\pm$ 0.001 | 0.826 $\pm$ 0.001<br>0.826 $\pm$ 0.002<br>0.826 $\pm$ 0.003 | 0.836<br>0.836<br>0.836 |       |
|                  | TabICL<br>+ DistPFN<br>+ DistPFN-T    | 0.845 $\pm$ 0.003<br>0.845 $\pm$ 0.003<br>0.845 $\pm$ 0.003 | 0.832 $\pm$ 0.003<br>0.832 $\pm$ 0.003<br>0.832 $\pm$ 0.003 | 0.832 $\pm$ 0.001<br>0.832 $\pm$ 0.001<br>0.832 $\pm$ 0.001 | 0.830 $\pm$ 0.002<br>0.830 $\pm$ 0.002<br>0.830 $\pm$ 0.002 | 0.826 $\pm$ 0.002<br>0.826 $\pm$ 0.002<br>0.826 $\pm$ 0.002 | 0.821 $\pm$ 0.002<br>0.821 $\pm$ 0.002<br>0.821 $\pm$ 0.002 | 0.813 $\pm$ 0.003<br>0.814 $\pm$ 0.003<br>0.814 $\pm$ 0.003 | 0.826<br>0.826<br>0.826 |       |
|                  | TabPFN-v2<br>+ DistPFN<br>+ DistPFN-T | 0.859 $\pm$ 0.002<br>0.859 $\pm$ 0.002<br>0.859 $\pm$ 0.002 | 0.843 $\pm$ 0.002<br>0.843 $\pm$ 0.002<br>0.843 $\pm$ 0.002 | 0.842 $\pm$ 0.003<br>0.843 $\pm$ 0.001<br>0.842 $\pm$ 0.003 | 0.841 $\pm$ 0.002<br>0.841 $\pm$ 0.002<br>0.841 $\pm$ 0.002 | 0.838 $\pm$ 0.002<br>0.838 $\pm$ 0.002<br>0.838 $\pm$ 0.002 | 0.833 $\pm$ 0.001<br>0.833 $\pm$ 0.001<br>0.833 $\pm$ 0.001 | 0.826 $\pm$ 0.002<br>0.826 $\pm$ 0.003<br>0.826 $\pm$ 0.003 | 0.837<br>0.837<br>0.837 |       |

Table L.1: Tabular classification results: ROC-AUC comparisons.
